# Supplementary material
Source: PubMed Central journal article supplement (PMC2842998)
Supplement: NIHMS145409-supplement-1.pdf [file NIHMS145409-supplement-1.pdf]

**IDN1 and IDN2: two proteins required for *de novo* DNA methylation in *Arabidopsis thaliana*.**

**Israel Ausin, Todd C. Mockler, Joanne Chory, and Steven E. Jacobsen**

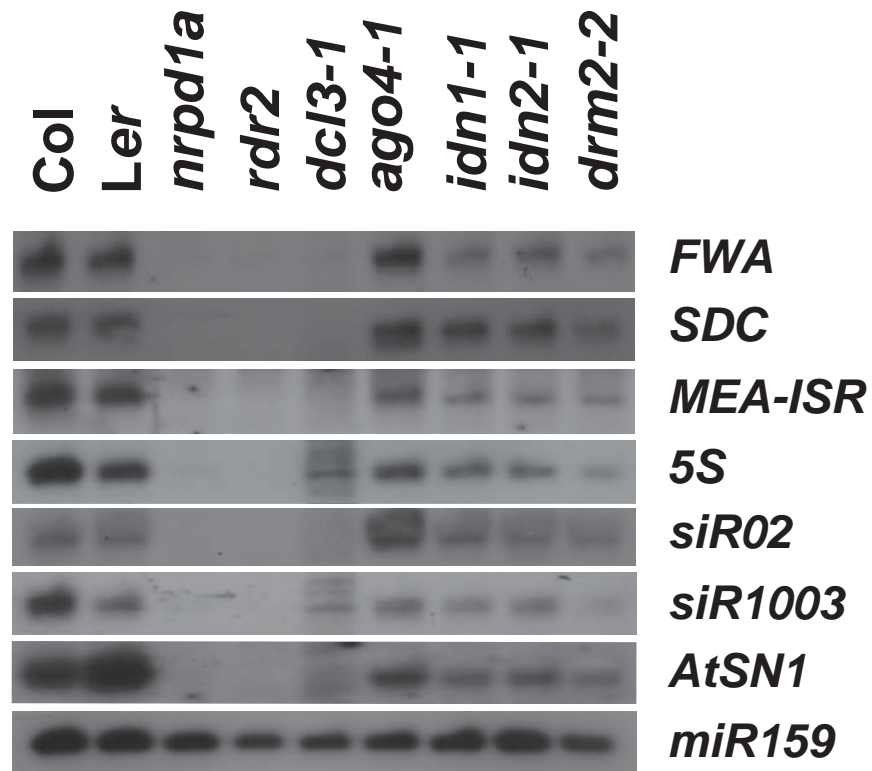

**Supplementary Figure 1.** Northern blot analysis of siRNAs abundance in wild type, *idn* mutants, and other RdDM mutants at several loci. Hybridization with *miR159* probe is shown as loading control.

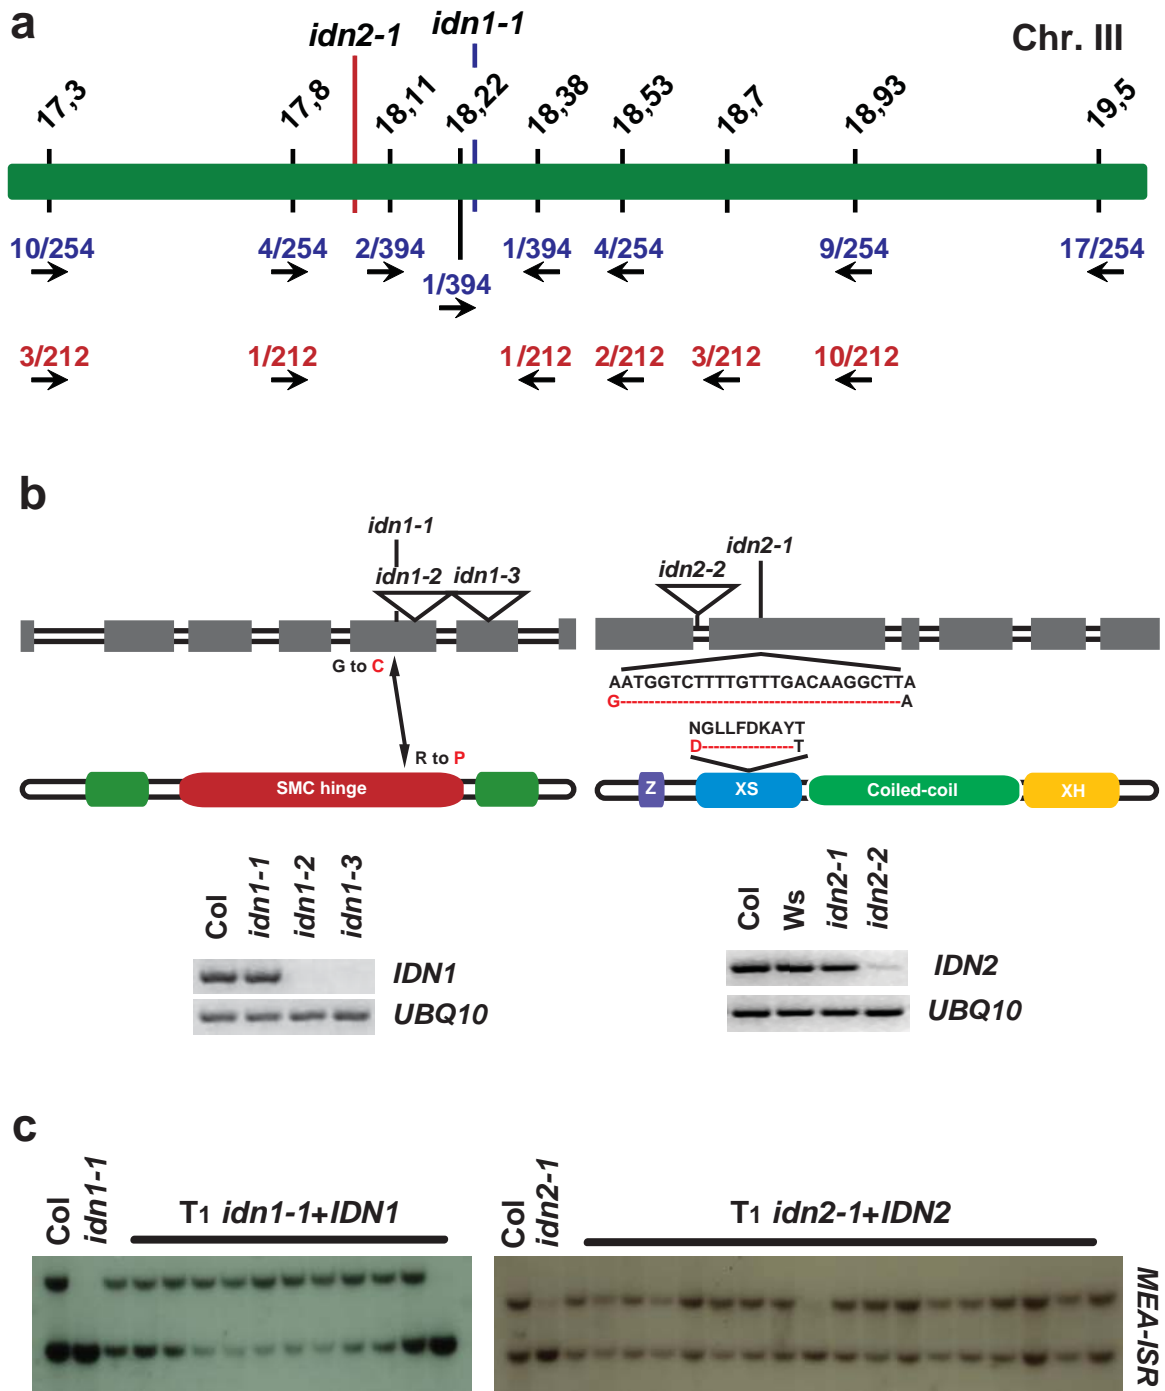

**Supplementary Figure 2.** Map based cloning of *IDN* genes. **a)** Genetic and physical map in the *IDN1* and *IDN2* genomic region. Numbers on the upper side of the green bar indicate the physical position in mega base pairs of markers used for mapping. Genetic distances to *idn1-1* (blue) and *idn2-1* (red) are indicated below every marker as the ratio of recombination events/ total  $F_2$  plants examined. Blue and red vertical bars depict *idn1-1* and *idn2-1* physical position, respectively. **b)** Structure of *IDN* genes and proteins. Exons are shown as grey boxes and introns as white bars. *idn* allele locations are shown in the upper part, capital letters correspond to the wild type/mutated nucleotides and amino acids. *IDN* gene expression levels in wild type and different *idn* mutant alleles are showed in the bottom panel. **c)** *idn1-1* and *idn2-1* genetic complementation. The figure shows the *MEAs-ISR* phenotype of wild type, *idn* mutants and several  $T_1$  *IDN* transformed plants.

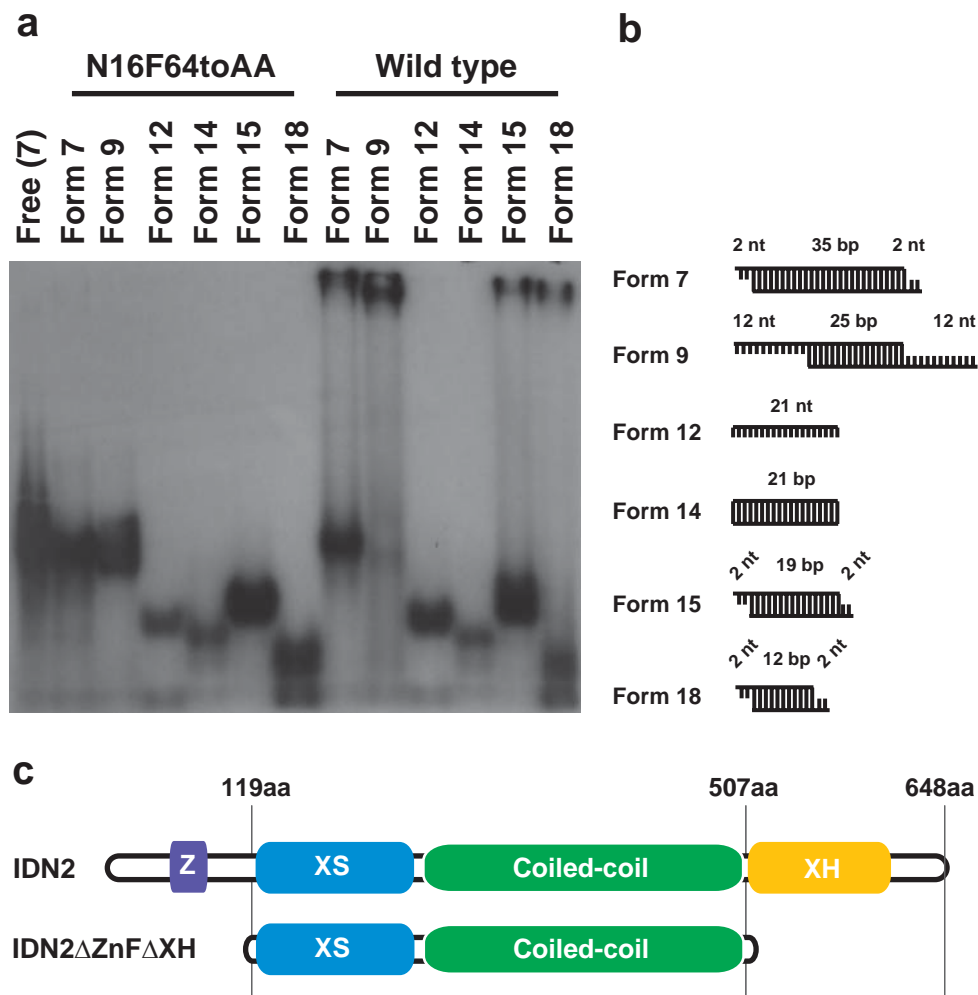

**Supplementary Figure 3.** IDN2 XS domain RNA binding assay. **a)** Electrophoretic mobility shift assay showing binding of IDN2 $\Delta$ ZnF $\Delta$ XH to different RNA species. **b)** Schematic view of the different RNA species used in this assay<sup>14</sup>. **c)** Schematic view of IDN2 whole protein and the portion used in this assay. We could not successfully express the XS domain alone, but the XS domain plus coiled coil domain was expressed and soluble.

**Supplementary Table1**

## List of T-DNAs used in this work

| TDNA_ID     | Locus     |
|-------------|-----------|
| SALK_000033 | At4g10070 |
| SALK_000645 | At1g29940 |
| SALK_000684 | At5g56140 |
| SALK_002477 | At5g47620 |
| SALK_003066 | At3g53460 |
| SALK_003772 | At5g57140 |
| SALK_005045 | At3g45630 |
| SALK_007447 | At3g08620 |
| SALK_007855 | At5g56930 |
| SALK_011416 | At3g12640 |
| SALK_012103 | At3g52260 |
| SALK_012148 | At5g59950 |
| SALK_013918 | At5g53060 |
| SALK_015201 | At3g23900 |
| SALK_016153 | At2g25910 |
| SALK_017222 | At3g09160 |
| SALK_017606 | At3g15010 |
| SALK_019314 | At2g38025 |
| SALK_019552 | At3g54770 |
| SALK_019773 | At3g54230 |
| SALK_020712 | At4g28990 |
| SALK_022160 | At1g49760 |
| SALK_022644 | At3g26932 |
| SALK_023061 | At1g74230 |
| SALK_023307 | At3g48830 |
| SALK_024210 | At5g19960 |
| SALK_024223 | At4g12640 |
| SALK_024784 | At5g51730 |
| SALK_025329 | At3g63450 |
| SALK_025341 | At1g14790 |
| SALK_025437 | At4g14660 |
| SALK_025521 | At5g37030 |
| SALK_026462 | At3g10845 |
| SALK_032699 | At2g24590 |
| SALK_034824 | At5g37370 |
| SALK_035330 | At1g03360 |
| SALK_036272 | At1g66370 |
| SALK_036327 | At3g09160 |
| SALK_036489 | At1g58350 |
| SALK_036777 | At1g79100 |
| SALK_036865 | At3g26420 |
| SALK_037042 | At2g38025 |
| SALK_037336 | At2g02150 |
| SALK_038117 | At5g16840 |
| SALK_038853 | At3g57420 |
| SALK_039135 | At2g48010 |
| SALK_039333 | At3g52980 |
| SALK_040864 | At1g55310 |
| SALK_041205 | At4g03110 |

|             |           |
|-------------|-----------|
| SALK_041457 | At5g54900 |
| SALK_041849 | At3g13570 |
| SALK_043248 | At5g65260 |
| SALK_043415 | At1g01080 |
| SALK_044432 | At3g53870 |
| SALK_047804 | At5g40490 |
| SALK_048634 | At2g22600 |
| SALK_048681 | At4g37900 |
| SALK_051144 | At5g43090 |
| SALK_052810 | At3g57420 |
| SALK_053222 | At1g51520 |
| SALK_053886 | At1g60830 |
| SALK_055376 | At4g20920 |
| SALK_058098 | At3g49500 |
| SALK_059236 | At2g33440 |
| SALK_059877 | At2g16940 |
| SALK_062177 | At5g51300 |
| SALK_065121 | At1g20880 |
| SALK_065234 | At5g51120 |
| SALK_066102 | At4g10400 |
| SALK_066841 | At4g34950 |
| SALK_067855 | At3g20420 |
| SALK_068296 | At4g36960 |
| SALK_068614 | At1g09230 |
| SALK_069336 | At5g05720 |
| SALK_069968 | At5g05470 |
| SALK_070953 | At3g05760 |
| SALK_074281 | At4g03120 |
| SALK_076082 | At2g29140 |
| SALK_076911 | At5g03480 |
| SALK_080562 | At4g14610 |
| SALK_082253 | At4g25880 |
| SALK_083356 | At1g67400 |
| SALK_087049 | At2g44940 |
| SALK_087645 | At2g42245 |
| SALK_088139 | At2g43370 |
| SALK_089931 | At2g32600 |
| SALK_091070 | At3g05760 |
| SALK_091410 | At5g43960 |
| SALK_091473 | At1g65810 |
| SALK_093123 | At2g28530 |
| SALK_093140 | At5g64490 |
| SALK_094414 | At3g47120 |
| SALK_094502 | At1g31600 |
| SALK_094909 | At5g02530 |
| SALK_095380 | At2g22100 |
| SALK_095639 | At1g67950 |
| SALK_095723 | At5g07060 |
| SALK_096775 | At5g46840 |
| SALK_097166 | At2g25850 |
| SALK_097962 | At4g34950 |
| SALK_098086 | At1g09660 |

|             |           |
|-------------|-----------|
| SALK_098485 | At5g06210 |
| SALK_106689 | At2g28450 |
| SALK_108458 | At4g14090 |
| SALK_110434 | At5g03330 |
| SALK_112300 | At1g14790 |
| SALK_114729 | At1g73490 |
| SALK_116982 | At5g59860 |
| SALK_117149 | At2g22090 |
| SALK_117672 | At5g10800 |
| SALK_120294 | At5g09610 |
| SALK_120729 | At4g30100 |
| SALK_123281 | At1g21312 |
| SALK_123656 | At2g40230 |
| SALK_124187 | At2g48010 |
| SALK_124568 | At1g33470 |
| SALK_125057 | At1g03140 |
| SALK_126794 | At5g25780 |
| SALK_128104 | At1g13190 |
| SALK_128588 | At5g53680 |
| SALK_130919 | At3g45950 |
| SALK_131168 | At5g53680 |
| SALK_133206 | At1g10320 |
| SALK_133418 | At2g25970 |
| SALK_133422 | At3g50100 |
| SALK_133693 | At5g53700 |
| SALK_134534 | At1g45100 |
| SALK_134814 | At4g28990 |
| SALK_136057 | At5g19030 |
| SALK_137840 | At5g07930 |
| SALK_138183 | At2g24350 |
| SALK_140422 | At3g48830 |
| SALK_140650 | At5g54900 |
| SALK_142085 | At1g07360 |
| SALK_142387 | At3g46470 |
| SALK_142827 | At5g47320 |
| SALK_144670 | At1g10480 |
| SALK_144720 | At5g03330 |
| SALK_144790 | At4g36690 |
| SALK_147099 | At4g16830 |
| SALK_147534 | At3g55930 |
| SALK_148062 | At2g29580 |
| SALK_149529 | At2g40660 |
| SALK_001711 | At1g01770 |
| SALK_001915 | At5g12440 |
| SALK_002422 | At1g76940 |
| SALK_003165 | At2g22100 |
| SALK_003214 | At1g76940 |
| SALK_003331 | At3g26932 |
| SALK_004132 | At1g16610 |
| SALK_004261 | At1g10320 |
| SALK_004748 | At1g67520 |
| SALK_006049 | At2g16940 |

|             |           |
|-------------|-----------|
| SALK_007933 | At4g03430 |
| SALK_008680 | At1g09230 |
| SALK_009083 | At5g25780 |
| SALK_009918 | At1g01080 |
| SALK_010277 | At2g37510 |
| SALK_012436 | At3g55340 |
| SALK_013085 | At2g39140 |
| SALK_013509 | At5g19030 |
| SALK_013818 | At5g11470 |
| SALK_013884 | At1g51520 |
| SALK_014599 | At3g49390 |
| SALK_016062 | At4g26480 |
| SALK_018266 | At3g54770 |
| SALK_018817 | At2g34050 |
| SALK_019467 | At5g07290 |
| SALK_019646 | At5g43960 |
| SALK_022363 | At5g58130 |
| SALK_023301 | At1g71770 |
| SALK_025119 | At1g09980 |
| SALK_025302 | At5g60180 |
| SALK_025388 | At1g27750 |
| SALK_026929 | At4g36960 |
| SALK_027002 | At5g04600 |
| SALK_027468 | At5g48650 |
| SALK_028815 | At5g07060 |
| SALK_029451 | At5g43110 |
| SALK_031965 | At3g13730 |
| SALK_032807 | At2g19120 |
| SALK_034227 | At5g59950 |
| SALK_034803 | At1g53390 |
| SALK_035759 | At2g29210 |
| SALK_036616 | At2g15040 |
| SALK_037487 | At1g71720 |
| SALK_037756 | At5g53180 |
| SALK_038169 | At5g53700 |
| SALK_038244 | At5g61030 |
| SALK_039123 | At3g52150 |
| SALK_039998 | At2g28450 |
| SALK_040327 | At4g24270 |
| SALK_041693 | At5g51730 |
| SALK_042023 | At3g26120 |
| SALK_042146 | At2g03640 |
| SALK_042437 | At4g27000 |
| SALK_044461 | At5g53720 |
| SALK_044680 | At2g41770 |
| SALK_046727 | At1g58050 |
| SALK_046738 | At1g12800 |
| SALK_048738 | At5g04280 |
| SALK_050136 | At4g10610 |
| SALK_051182 | At5g46190 |
| SALK_051237 | At5g50250 |
| SALK_053590 | At1g48920 |



|             |           |
|-------------|-----------|
| SALK_054169 | At4g29060 |
| SALK_054409 | At1g03457 |
| SALK_054627 | At2g40230 |
| SALK_054719 | At5g41490 |
| SALK_055030 | At1g60200 |
| SALK_055049 | At1g60900 |
| SALK_055951 | At4g24770 |
| SALK_055957 | At3g21215 |
| SALK_055985 | At3g25470 |
| SALK_056508 | At2g38610 |
| SALK_057051 | At3g50670 |
| SALK_057095 | At3g12130 |
| SALK_057302 | At5g56510 |
| SALK_057332 | At5g09610 |
| SALK_058073 | At4g14040 |
| SALK_058330 | At2g03640 |
| SALK_059436 | At3g14450 |
| SALK_059714 | At4g13850 |
| SALK_059914 | At3g19090 |
| SALK_060577 | At1g06960 |
| SALK_060588 | At3g14450 |
| SALK_061143 | At3g55930 |
| SALK_061797 | At5g64390 |
| SALK_062723 | At1g70200 |
| SALK_063749 | At4g38780 |
| SALK_064174 | At3g15605 |
| SALK_065735 | At3g55200 |
| SALK_065838 | At5g05470 |
| SALK_066572 | At3g23900 |
| SALK_066670 | At4g26650 |
| SALK_066706 | At1g30480 |
| SALK_067789 | At1g47490 |
| SALK_068298 | At2g35410 |
| SALK_068893 | At5g53180 |
| SALK_069027 | At5g37370 |
| SALK_070257 | At5g06000 |
| SALK_072632 | At3g10360 |
| SALK_073630 | At1g79880 |
| SALK_075516 | At1g37140 |
| SALK_076130 | At3g11400 |
| SALK_076506 | At5g38890 |
| SALK_077584 | At1g53650 |
| SALK_079477 | At5g02950 |
| SALK_079971 | At1g45100 |
| SALK_080472 | At2g25910 |
| SALK_081180 | At4g32850 |
| SALK_081263 | At5g45150 |
| SALK_083797 | At3g16230 |
| SALK_083956 | At2g21690 |
| SALK_085295 | At4g38780 |
| SALK_086134 | At3g06455 |
| SALK_086376 | At4g35785 |

|             |           |
|-------------|-----------|
| SALK_086442 | At1g09980 |
| SALK_086644 | At5g44200 |
| SALK_086789 | At5g37720 |
| SALK_087472 | At1g03750 |
| SALK_089787 | At3g16230 |
| SALK_090706 | At5g51140 |
| SALK_091344 | At2g42890 |
| SALK_092896 | At5g67240 |
| SALK_092951 | At1g70200 |
| SALK_095029 | At3g06970 |
| SALK_095947 | At3g52260 |
| SALK_098982 | At5g09880 |
| SALK_099429 | At1g53120 |
| SALK_100910 | At2g29200 |
| SALK_103173 | At5g39850 |
| SALK_103708 | At5g01720 |
| SALK_104393 | At2g33260 |
| SALK_106583 | At5g61960 |
| SALK_106715 | At1g60200 |
| SALK_107553 | At2g30260 |
| SALK_109613 | At4g24770 |
| SALK_110767 | At1g67770 |
| SALK_111191 | At4g32720 |
| SALK_112762 | At3g21500 |
| SALK_112974 | At1g58060 |
| SALK_114454 | At3g62620 |
| SALK_115366 | At3g52980 |
| SALK_117093 | At2g46780 |
| SALK_117605 | At5g02670 |
| SALK_121879 | At3g25440 |
| SALK_123107 | At1g22760 |
| SALK_123607 | At3g19090 |
| SALK_123695 | At3g12640 |
| SALK_123942 | At1g27050 |
| SALK_124398 | At3g50310 |
| SALK_125884 | At3g03920 |
| SALK_126609 | At5g41070 |
| SALK_128896 | At5g37150 |
| SALK_128964 | At3g49650 |
| SALK_129612 | At3g06560 |
| SALK_129864 | At5g02740 |
| SALK_131091 | At3g07250 |
| SALK_132069 | At1g12800 |
| SALK_132876 | At4g20030 |
| SALK_132881 | At1g07360 |
| SALK_132986 | At1g09140 |
| SALK_133899 | At5g41070 |
| SALK_134112 | At1g53120 |
| SALK_134694 | At5g32450 |
| SALK_135024 | At2g18510 |
| SALK_135314 | At2g29210 |
| SALK_135626 | At5g64270 |

|                        |           |
|------------------------|-----------|
| SALK_135802            | At4g13850 |
| SALK_135857            | At3g06560 |
| SALK_138700            | At3g56860 |
| SALK_139384            | At3g07250 |
| SALK_139740            | At5g37030 |
| SALK_140803            | At3g52150 |
| SALK_141510            | At4g03110 |
| SALK_141673            | At5g37140 |
| SALK_142402            | At1g49600 |
| SALK_142669            | At2g37510 |
| SALK_143514            | At4g16830 |
| SALK_143617            | At1g58050 |
| SALK_144592            | At2g38610 |
| SALK_145439            | At3g13730 |
| SALK_146054            | At3g13224 |
| SALK_146760            | At4g20920 |
| SALK_147085            | At3g45590 |
| SALK_147963            | At2g34050 |
| SALK_148392            | At1g65810 |
| SALK_148591            | At2g01130 |
| SALK_148835            | At5g66010 |
| SALK_149372            | At3g13224 |
| SALK_149863            | At2g33440 |
| SALK_150303            | At2g33260 |
| SALK_152559            | At1g69210 |
| SALK_007750            | At3g04610 |
| SALK_116177            | At4g27000 |
| SALK_057540            | At4g16280 |
| SALK_128104            | At1g13190 |
| SALK_055265            | At4g26000 |
| SALK_132014            | At1g20880 |
| SALK_137751            | At4g11970 |
| SALK_006049            | At2g16940 |
| SALK_056508            | At2g38610 |
| SALK_136270            | At1g69250 |
| SALK_090357            | At1g13190 |
| SALK_130322            | At1g27750 |
| SALK_128379            | At4g26650 |
| SALK_007833            | At1g48920 |
| SALK_144707            | At2g39140 |
| WiscDsLox256E06        | At4g32850 |
| WiscDsLox287G04        | At1g49760 |
| WiscDsLox289_292D17    | At1g80070 |
| WiscDsLox289_292M16    | At3g45630 |
| WiscDsLox289_292N13    | At2g43970 |
| WiscDsLox293-296invN19 | At3g52380 |
| WiscDsLox320D12        | At4g10400 |
| WiscDsLox321F12        | At1g60900 |
| WiscDsLox323G06        | At1g71500 |
| WiscDsLox328D12        | At3g48830 |
| WiscDsLox335D11        | At3g26420 |
| WiscDsLox373D06        | At2g20490 |

|                     |           |
|---------------------|-----------|
| WiscDsLox376C09     | At3g25470 |
| WiscDsLox377-380G20 | At1g76050 |
| WiscDsLox384B10     | At5g18810 |
| WiscDsLox390G04     | At3g21500 |
| WiscDsLox413-416N7  | At3g04610 |
| WiscDsLox425H12     | At1g74230 |
| WiscDsLox446E01     | At4g19610 |
| WiscDsLox449D08     | At3g50100 |
| WiscDsLox453-456F8  | At4g32720 |
| WiscDsLox457-460H17 | At2g31610 |
| WiscDsLox461-464D10 | At3g53870 |
| WiscDsLox461-464L2  | At5g16840 |
| WiscDsLox467D11     | At3g54230 |
| WiscDsLox7F05       | At5g61030 |
| WiscDsLox238E04     | At2g28380 |
| WiscDsLox246B03     | At5g64200 |
| WiscDsLox247E04     | At4g02430 |
| WiscDsLox335D09     | At3g25470 |
| WiscDsLox340C12     | At1g71800 |
| WiscDsLox382G12     | At4g25500 |
| WiscDsLox384G9      | At4g13070 |
| WiscDsLox461-464N10 | At5g02530 |
| WiscDsLox461-464N18 | At1g27750 |
| SALK_013483         | At1g11420 |
| SALK_071707         | At1g11420 |
| SALK_103541         | At2g47230 |
| SALK_106147         | At5g13020 |
| SALK_032667         | At5g23800 |
| SALK_009156         | At5g23800 |
| SALK_021687         | At5g42670 |
| SALK_077088         | At3g12140 |
| SALK_026271         | At5g42670 |
| SALK_081292         | At2g02570 |
| SALK_116222         | At5g06780 |
| SALK_014641         | At5g20030 |
| SALK_001972         | At5g23770 |
| SALK_041367         | At5g58610 |
| SALK_005190         | At5g58610 |
| SALK_039205         | At4g32620 |
| SALK_054748         | At4g32620 |
| SALK_134878         | At1g09320 |
| SALK_099693         | At1g68580 |
| SALK_087332         | At3g06520 |
| SALK_100853         | At5g55600 |
| SALK_073041         | At5g61780 |
| SALK_099693         | At1g68580 |
| SALK_074555         | At3g48050 |
| SALK_086029         | At3g48060 |
| SALK_017750         | At4g11560 |
| SALK_094920         | At4g12620 |
| SALK_140010         | At4g14700 |
| SALK_042536         | At4g12620 |

|                 |           |
|-----------------|-----------|
| SALK_074694     | At5g04240 |
| SALK_025269     | At2g38950 |
| SALK_049697     | At1g62310 |
| GABI_085H03     | At1g09060 |
| SALK_135712     | At4g20400 |
| SALK_142477     | At1g62830 |
| GABI_438B06     | At1g62830 |
| SALK_073422     | At1g30810 |
| SALK_135831     | At3g13682 |
| SALK_003313     | At3g45880 |
| SALK_122006     | At3g48430 |
| GABI_454C10     | At3g20810 |
| SAIL_680_G02    | At5g06550 |
| WiscDsLox263E02 | At4g21430 |
| SAIL_811_H12    | At3g20810 |
| WiscDsLox376H12 | At2g38950 |

**Supplementary Table2** List of primers used in this work

| <b>Primer</b> | <b>Sequence 5'-3'</b>                  |
|---------------|----------------------------------------|
| JP2004        | GGTTTTATATTAATATTAAGAGTTATGGGTYGAAGTTT |
| JP4423        | AACCAAATCATTCTCTAAACAAAATATAAAAAATC    |
| JP1026        | AAAGTGGTTGTAGTTTATGAAAGGTTTTAT         |
| JP1027        | CTTAAAAAATTTTCAACTCATTTTTAAAAA         |
| JP6349        | GAAAAAGTTGGAATGGGTTTGGAGAGTTTAA        |
| JP6350        | CAACAAACCCTAATATATTTTTATATTTAAAC       |
| JP5353        | GGAGAGCCCAACAACCCTATT                  |
| JP5354        | TTGGGATTTGATGGTGTTTGAG                 |
| JP5359        | TGGGACTCGCTCAATGTT                     |
| JP5502        | TCATCTGGGTGTGTTTCATTGGC                |
| JP6509        | TGTCCATCATCTTGCAGCTCTAA                |
| JP6510        | AAGACCAAAGGAGGCAAAAGG                  |
| JP3483        | GATCTTTGCCGAAAACAATTGGAGG              |
| JP3484        | CGACTTGTCATTAGAAAGAAAGAGAT             |

## SUPPLEMENTARY METHODS

**Plant materials.** We used the following Arabidopsis strains: the wild type *Ler*, *Ws*, and *Col*; the recessive *ago4-1* allele in *Ler* background; recessive alleles in *Col* background, *idn1-1=dms3-4* from our screen; *idn1-2=dms3-5* (SALK\_068723); *idn1-3=dms3-6* (SALK\_125019); *idn2-1* from our screen; *cmt3-11*, *nrdp1a*, *rdr2-1*, *dcl3-1*, *drm2-2*; and mutated alleles in *Ws* background, *idn2-2* (FLAG\_550B05).

**Bisulfite analysis.** We performed sodium bisulfite sequencing using EZ DNA Methylation Gold (Zymo Research) by following the manufacturer's instructions. The primers used for *FWA* were JP2004 and JP4423, for *MEA-ISR* were JP1026 and JP1027 and for *SDC* were JP6349 and JP6350. We cloned the resulting PCR fragments into pCR2.1-TOPO (Invitrogen) and analysed 15 to 22 clones per sample. All primers are listed in Table S2.

**McrBC-PCR assay.** We digested approximately 500ng of DNA using 20 units of McrBC (New England Biolabs) overnight in a total volume of 25  $\mu$ L. We used 1-2  $\mu$ L for the PCR. PCR was stopped after 21-30 cycles for gel-based analysis. The primers used for *SDC* were JP5353 and JP5354 and for *UBQ10* were JP3483 and JP3484. All primers are listed in Table S2.

**SDC/FWA transformation and flowering time analysis.** We transformed plants with *SDC* as reported in<sup>8</sup>. We performed *FWA* transformation using an AGL0 *Agrobacterium tumefaciens* strain carrying a pCAMBIA3300 vector with an engineered version of *FWA* in which an *EcoRI* site was converted into a *BglII* site. For selection, we sprayed the resultant T<sub>1</sub> population with a 1:1000 dilution of Finale<sup>TM</sup>. We measured flowering time of resistant plants as the total number of leaves (rosette and cauline leaves) developed by a plant.

**Expression analysis.** We analyzed *SDC* expression as reported in<sup>8</sup>. We analysed *IDN1* (=DMS3) and *IDN2* expression by RT-PCR. We isolated total RNA using TRIzol Reagent (Invitrogen) and then synthesized cDNA first strand using SuperScriptII (Invitrogen) by following manufacturer's procedures. The primers used for *IDN1* (=DMS3) were JP5359 and JP5502 and for *IDN2* were JP6509 and JP6510. As a control

we also amplified *UBQ10* using the primers JP3483 and JP3484. PCR was stopped after 21-25 cycles for gel-based analysis. We performed small RNA analysis as described in<sup>8</sup>. All primers are listed in Table S1.

**Southern blotting.** We performed *MEA-ISR* and 5S Southern blotting, hybridization and analysis as described in S1.

***AtSN1 HaeIII* cutting assay.** We performed *AtSN1 HaeIII* cutting assay described in S2

**RNA binding assays** were performed as described in<sup>14</sup>

## **SUPPLEMENTARY REFERENCES**

S1. Lianna M. Johnson, et al. *PLoS Genetics* **4**, e1000280. (2008)

S2. Onodera, Y. et al. *Cell* **120**, 613-22.(2005)
